# Supplementary material for: Pathway-based gene signatures predicting clinical outcome of lung adenocarcinoma
Source: PubMed Central journal article supplement (PMC4455286; doi:10.1038/srep10979), 2015-06-04

# **Pathway-based gene signatures predicting clinical outcome of lung adenocarcinoma**

Ya-Hsuan Chang<sup>1</sup>, Chung-Ming Chen<sup>1</sup>, Hsuan-Yu Chen<sup>2\*</sup>, and Pan-Chyr  
Yang<sup>3</sup>

<sup>1</sup>Institute of Biomedical Engineering, National Taiwan University, No1,  
Sec. 1, Jen - Ai Rd., Taipei 100, Taiwan

<sup>2</sup>Institute of Statistical Science, Academia Sinica, 128 Academia Road,  
Section 2, Nankang, Taipei, Taiwan

<sup>3</sup>Department of Internal Medicine, National Taiwan University College of  
Medicine, 1Jen-Ai Road, Section 1, Taipei, Taiwan

\*Corresponding Author: Hsuan-Yu Chen

Phone: +(886)-2-6614-5675

Fax: +(886)-2-2782-1523

Email: [hychen@stat.sinica.edu.tw](mailto:hychen@stat.sinica.edu.tw)

Address: 128 Academia Road, Section 2, Nankang, Taipei 11529, Taiwan

Table S1. Clinical characteristics of 443 lung adenocarcinoma in 4 institutes.

|                          | CAN/DF | HLM    | UM     | MSK    |
|--------------------------|--------|--------|--------|--------|
| Sample size              | 82     | 79     | 178    | 104    |
| Age(mean, s.d.)          | 62(10) | 67(10) | 64(10) | 65(10) |
| Gender(% male)           | 56%    | 51%    | 57%    | 36%    |
| Stage I                  | 68%    | 54%    | 65%    | 61%    |
| Stage II                 | 32%    | 26%    | 17%    | 19%    |
| Stage III                | 0%     | 19%    | 18%    | 20%    |
| Median follow-up(months) | 51     | 39     | 53     | 43     |
| Number of deaths         | 35     | 60     | 103    | 39     |

Table S2. Hazard ratios estimated from meta-analysis of genes in the HMGB1/RAGE signaling pathway.

| Probesets   | Gene    | Uni gene  | HR <sup>a</sup> | 95% C.I. <sup>a</sup> |      |
|-------------|---------|-----------|-----------------|-----------------------|------|
| 204314_s_at | CREB1   | Hs.584750 | 0.70            | 0.52                  | 0.94 |
| 209190_s_at | DIAPH1  | Hs.529451 | 0.61            | 0.46                  | 0.82 |
| 213514_s_at | DIAPH1  | Hs.529451 | 0.73            | 0.58                  | 0.92 |
| 204363_at   | F3      | Hs.62192  | 1.25            | 1.10                  | 1.42 |
| 214938_x_at | HMGB1   | Hs.434102 | 0.58            | 0.37                  | 0.89 |
| 216244_at   | IL1RN   | Hs.81134  | 1.15            | 1.03                  | 1.27 |
| 205207_at   | IL6     | Hs.654458 | 1.18            | 1.02                  | 1.35 |
| 202670_at   | MAP2K1  | Hs.145442 | 1.36            | 1.03                  | 1.79 |
| 213490_s_at | MAP2K2  | Hs.465627 | 1.33            | 1.03                  | 1.71 |
| 205698_s_at | MAP2K6  | Hs.463978 | 1.32            | 1.08                  | 1.61 |
| 211500_at   | MAPK11  | Hs.57732  | 1.29            | 1.03                  | 1.60 |
| 206106_at   | MAPK12  | Hs.432642 | 1.21            | 1.02                  | 1.42 |
| 212535_at   | MEF2A   | Hs.268675 | 0.69            | 0.51                  | 0.93 |
| 209199_s_at | MEF2C   | Hs.699175 | 0.78            | 0.65                  | 0.94 |
| 209200_at   | MEF2C   | Hs.699175 | 0.84            | 0.75                  | 0.94 |
| 211524_at   | NFKB2   | Hs.73090  | 1.13            | 1.00                  | 1.28 |
| 214062_x_at | NFKBIB  | Hs.9731   | 0.86            | 0.76                  | 0.97 |
| 212239_at   | PIK3R1  | Hs.132225 | 0.76            | 0.60                  | 0.97 |
| 212240_s_at | PIK3R1  | Hs.132225 | 0.77            | 0.61                  | 0.97 |
| 207821_s_at | PTK2    | Hs.395482 | 0.75            | 0.58                  | 0.96 |
| 208820_at   | PTK2    | Hs.395482 | 0.73            | 0.57                  | 0.92 |
| 201087_at   | PXN     | Hs.446336 | 1.50            | 1.05                  | 2.14 |
| 206036_s_at | REL     | Hs.631886 | 0.71            | 0.57                  | 0.89 |
| 203843_at   | RPS6KA3 | Hs.445387 | 0.76            | 0.59                  | 0.97 |
| 204035_at   | SCG2    | Hs.516726 | 1.13            | 1.02                  | 1.26 |

**HR: hazard ratio; 95% C.I.: 95% confidence interval**

<sup>a</sup> Adjusted by age, sex, and stage

Table S3. Hazard ratios estimated from meta-analysis of genes in the Beta-adrenergic receptors regulation of ERK pathway.

| Probesets   | Gene    | Uni gene  | HR <sup>a</sup> | 95% C.I. <sup>a</sup> |      |
|-------------|---------|-----------|-----------------|-----------------------|------|
| 209321_s_at | ADCY3   | Hs.705457 | 1.43            | 1.12                  | 1.84 |
| 204497_at   | ADCY9   | Hs.391860 | 0.77            | 0.68                  | 0.88 |
| 204498_s_at | ADCY9   | Hs.391860 | 0.69            | 0.55                  | 0.87 |
| 206170_at   | ADRB2   | Hs.591251 | 0.84            | 0.70                  | 1.00 |
| 217523_at   | CD44    | Hs.502328 | 0.86            | 0.75                  | 0.98 |
| 201179_s_at | GNAI3   | Hs.73799  | 1.64            | 1.20                  | 2.25 |
| 211858_x_at | GNAS    | Hs.125898 | 1.28            | 1.00                  | 1.65 |
| 200852_x_at | GNB2    | Hs.185172 | 1.50            | 1.11                  | 2.03 |
| 211871_x_at | GNB5    | Hs.155090 | 1.35            | 1.01                  | 1.81 |
| 212294_at   | GNG12   | Hs.431101 | 0.77            | 0.61                  | 0.96 |
| 205184_at   | GNG4    | Hs.159711 | 1.24            | 1.06                  | 1.44 |
| 207157_s_at | GNG5    | Hs.645427 | 1.70            | 1.16                  | 2.49 |
| 206896_s_at | GNG7    | Hs.515544 | 0.79            | 0.64                  | 0.98 |
| 202670_at   | MAP2K1  | Hs.145442 | 1.36            | 1.03                  | 1.79 |
| 213490_s_at | MAP2K2  | Hs.465627 | 1.33            | 1.03                  | 1.71 |
| 204524_at   | PDPK1   | Hs.459691 | 0.70            | 0.53                  | 0.93 |
| 32029_at    | PDPK1   | Hs.459691 | 0.69            | 0.50                  | 0.96 |
| 206370_at   | PIK3CG  | Hs.32942  | 0.86            | 0.78                  | 0.96 |
| 205111_s_at | PLCE1   | Hs.655033 | 0.85            | 0.72                  | 1.00 |
| 208652_at   | PPP2CA  | Hs.483408 | 0.67            | 0.47                  | 0.97 |
| 200605_s_at | PRKAR1A | Hs.280342 | 0.74            | 0.56                  | 0.97 |
| 214487_s_at | RAP2A   | Hs.508480 | 1.29            | 1.03                  | 1.62 |
| 215992_s_at | RAPGEF2 | Hs.113912 | 0.83            | 0.71                  | 0.98 |
| 205590_at   | RASGRP1 | Hs.591127 | 0.84            | 0.73                  | 0.97 |

**HR: hazard ratio; 95%C.I.: 95% confidence interval**

<sup>a</sup> **Adjusted by age, sex, and stage**

Table S4. Hazard ratios estimated from meta-analysis of genes in the Clathrin-coated vesicle cycle pathway.

| Probesets   | Gene      | Uni gene  | HR <sup>a</sup> | 95% C.I. <sup>a</sup> |      |
|-------------|-----------|-----------|-----------------|-----------------------|------|
| 215787_at   | ACTA2     | Hs.500483 | 0.77            | 0.62                  | 0.95 |
| 205423_at   | AP1B1     | Hs.368794 | 1.33            | 1.01                  | 1.75 |
| 205196_s_at | AP1S1     | Hs.563509 | 1.22            | 1.02                  | 1.44 |
| 211779_x_at | AP2A2     | Hs.19121  | 0.67            | 0.48                  | 0.93 |
| 212159_x_at | AP2A2     | Hs.19121  | 0.67            | 0.48                  | 0.92 |
| 212161_at   | AP2A2     | Hs.19121  | 0.68            | 0.47                  | 0.97 |
| 202120_x_at | AP2S1     | Hs.119591 | 1.66            | 1.18                  | 2.33 |
| 211047_x_at | AP2S1     | Hs.119591 | 1.39            | 1.04                  | 1.86 |
| 208750_s_at | ARF1      | Hs.286221 | 1.29            | 1.01                  | 1.66 |
| 201358_s_at | COPB1     | Hs.339278 | 0.57            | 0.37                  | 0.88 |
| 201264_at   | COPE      | Hs.10326  | 1.46            | 1.12                  | 1.89 |
| 217726_at   | COPZ1     | Hs.505652 | 1.48            | 1.06                  | 2.05 |
| 201279_s_at | DAB2      | Hs.481980 | 0.81            | 0.67                  | 0.99 |
| 201280_s_at | DAB2      | Hs.481980 | 0.82            | 0.70                  | 0.95 |
| 210757_x_at | DAB2      | Hs.481980 | 0.80            | 0.65                  | 0.99 |
| 217886_at   | EPS15     | Hs.83722  | 0.67            | 0.48                  | 0.95 |
| 217887_s_at | EPS15     | Hs.83722  | 0.77            | 0.59                  | 1.00 |
| 205425_at   | HIP1      | Hs.329266 | 0.79            | 0.66                  | 0.95 |
| 215074_at   | MYO1B     | Hs.439620 | 0.73            | 0.65                  | 0.82 |
| 212511_at   | PICALM    | Hs.163893 | 0.70            | 0.52                  | 0.93 |
| 217861_s_at | PREB      | Hs.279784 | 1.49            | 1.07                  | 2.07 |
| 200863_s_at | RAB11A    | Hs.321541 | 1.42            | 1.07                  | 1.89 |
| 219681_s_at | RAB11FIP1 | Hs.696035 | 0.79            | 0.67                  | 0.94 |
| 211961_s_at | RAB7A     | Hs.15738  | 0.62            | 0.41                  | 0.93 |
| 203150_at   | RABEPK    | Hs.19012  | 1.34            | 1.01                  | 1.80 |
| 201542_at   | SAR1A     | Hs.499960 | 0.72            | 0.52                  | 0.98 |
| 218254_s_at | SAR1B     | Hs.432984 | 0.72            | 0.57                  | 0.90 |
| 201583_s_at | SEC23B    | Hs.369373 | 1.36            | 1.07                  | 1.72 |
| 212900_at   | SEC24A    | Hs.595540 | 0.68            | 0.51                  | 0.91 |
| 212902_at   | SEC24A    | Hs.595540 | 0.72            | 0.56                  | 0.93 |
| 215209_at   | SEC24D    | Hs.189641 | 0.76            | 0.66                  | 0.88 |
| 215641_at   | SEC24D    | Hs.189641 | 0.73            | 0.63                  | 0.85 |
| 209091_s_at | SH3GLB1   | Hs.136309 | 1.44            | 1.11                  | 1.89 |
| 210101_x_at | SH3GLB1   | Hs.136309 | 1.42            | 1.06                  | 1.91 |
| 212111_at   | STX12     | Hs.523855 | 0.66            | 0.49                  | 0.89 |

|             |       |           |      |      |      |
|-------------|-------|-----------|------|------|------|
| 212112_s_at | STX12 | Hs.523855 | 0.63 | 0.45 | 0.90 |
| 212799_at   | STX6  | Hs.518417 | 0.60 | 0.42 | 0.86 |
| 203457_at   | STX7  | Hs.593148 | 0.72 | 0.52 | 1.00 |
| 212631_at   | STX7  | Hs.593148 | 0.75 | 0.58 | 0.95 |
| 212632_at   | STX7  | Hs.593148 | 0.63 | 0.45 | 0.88 |
| 213480_at   | VAMP4 | Hs.6651   | 0.66 | 0.47 | 0.93 |
| 202546_at   | VAMP8 | Hs.534373 | 0.74 | 0.59 | 0.92 |
| 207967_at   | VPS45 | Hs.443750 | 0.78 | 0.63 | 0.96 |

---

**HR: hazard ratio; 95% C.I.: 95% confidence interval**

<sup>a</sup> **Adjusted by age, sex, and stage**

Table S5. Results of multivariate Cox proportional hazards regression for 2418 genes, selected by the inverse-variance weighting method for four datasets.

| Dataset | Number of significant hazard ratio | Minimum significant hazard ratio | Maximum significant hazard ratio |
|---------|------------------------------------|----------------------------------|----------------------------------|
| CAN/DF  | 820                                | 0.05                             | 8.35                             |
| HLM     | 574                                | 0.11                             | 4.65                             |
| UM      | 429                                | 0.40                             | 3.36                             |
| MSK     | 622                                | 0.05                             | 11.3                             |

## **Figure legends**

Figure S1. The flowchart of data analysis.

Figure S2. Immune response\_HMGB1/RAGE signaling pathway.

Figure S3. Development\_Beta-adrenergic receptors regulation of ERK pathway.

Figure S4. Transport\_Clatherin-coated vesicle cycle pathway.

Figure S5. Distributions of hazard ratios and p values, estimated from multivariate Cox proportional hazards regression. Black dots denoted 2418 genes and red dots denoted three pathway-based signatures and CPBR score



**Figure S1**

Affymetrix HG-U133A  
Microarray raw data

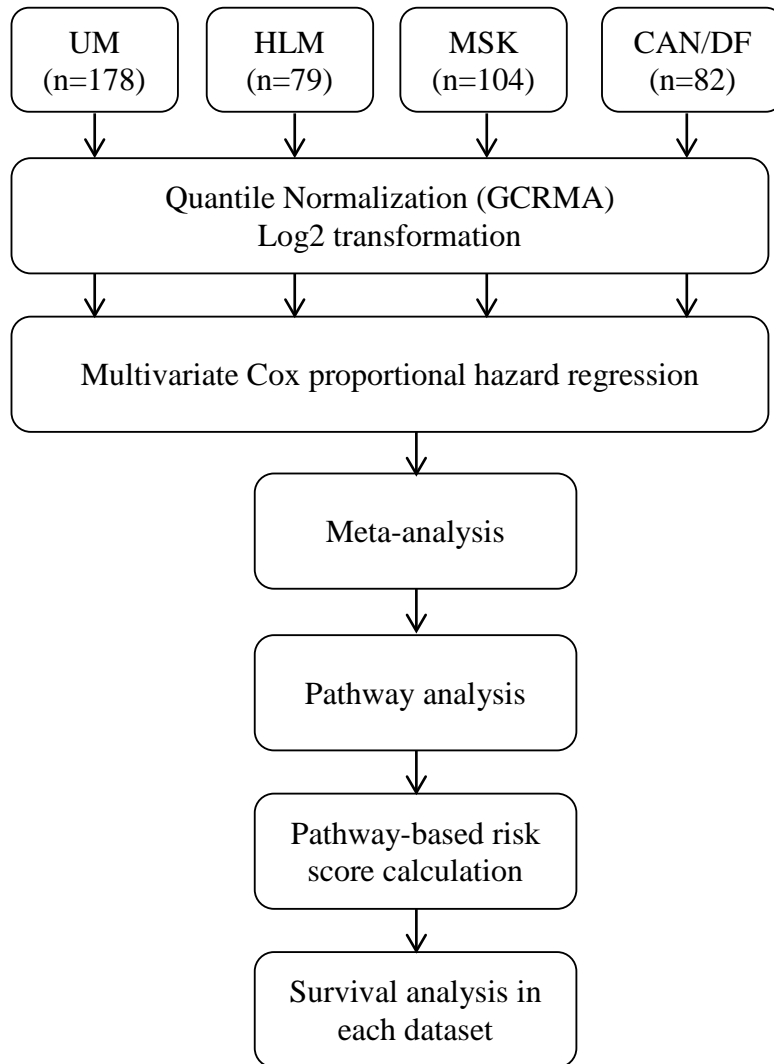

**Figure S2.**

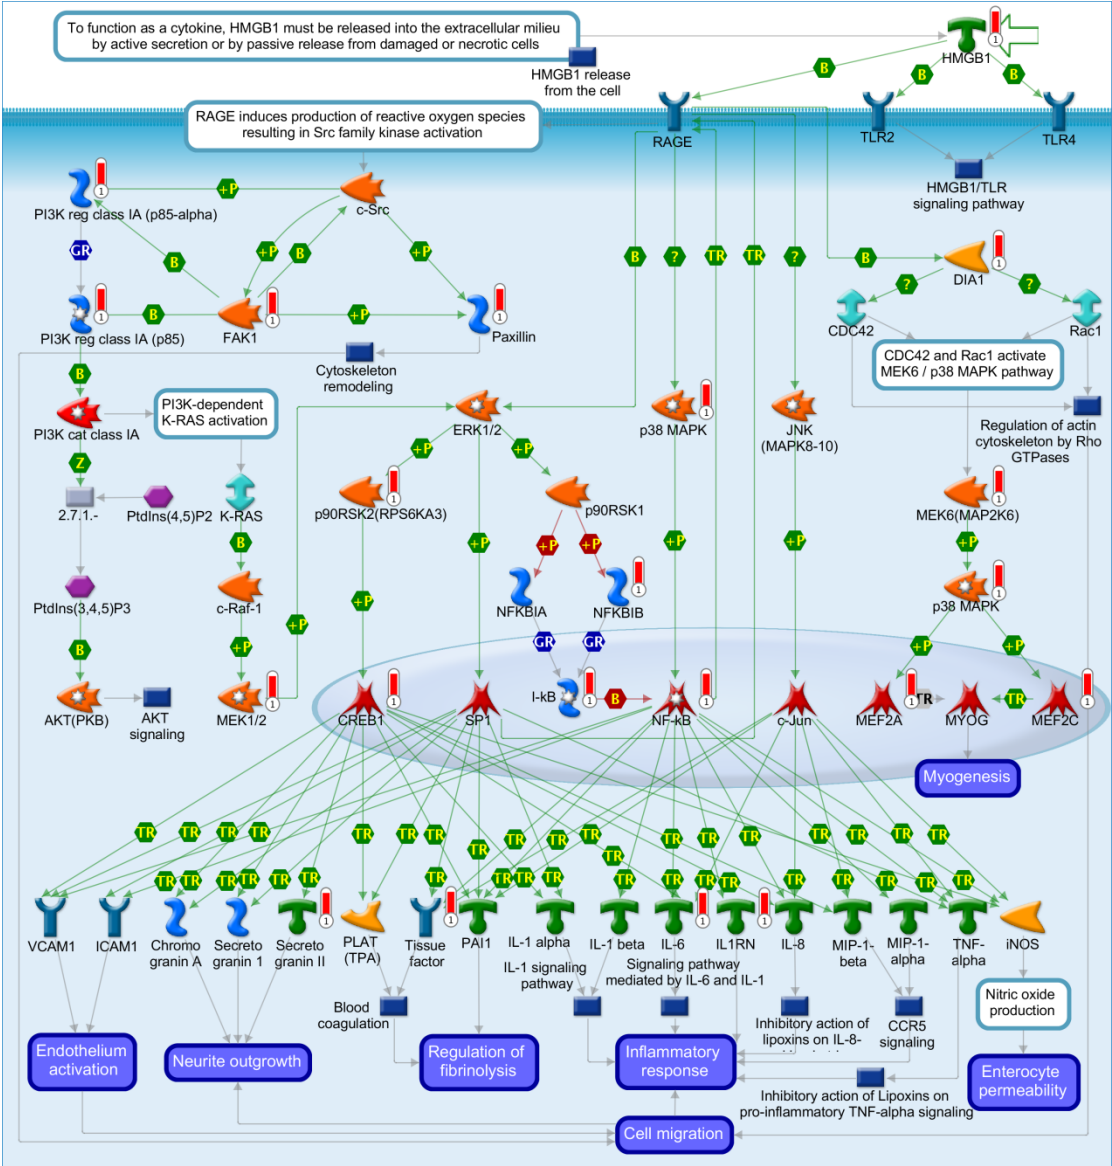

**Figure S3.**

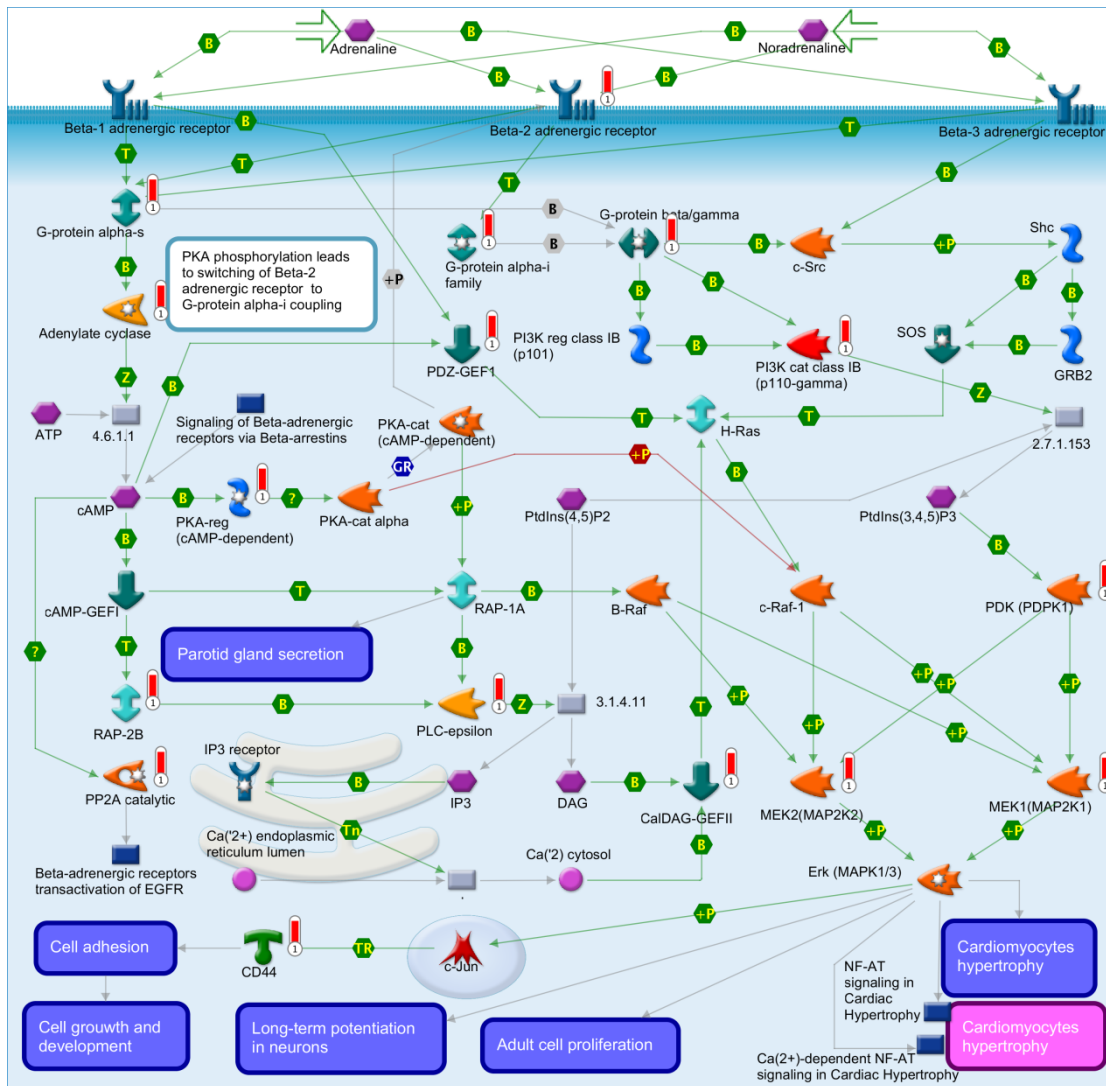

**Figure S4.**

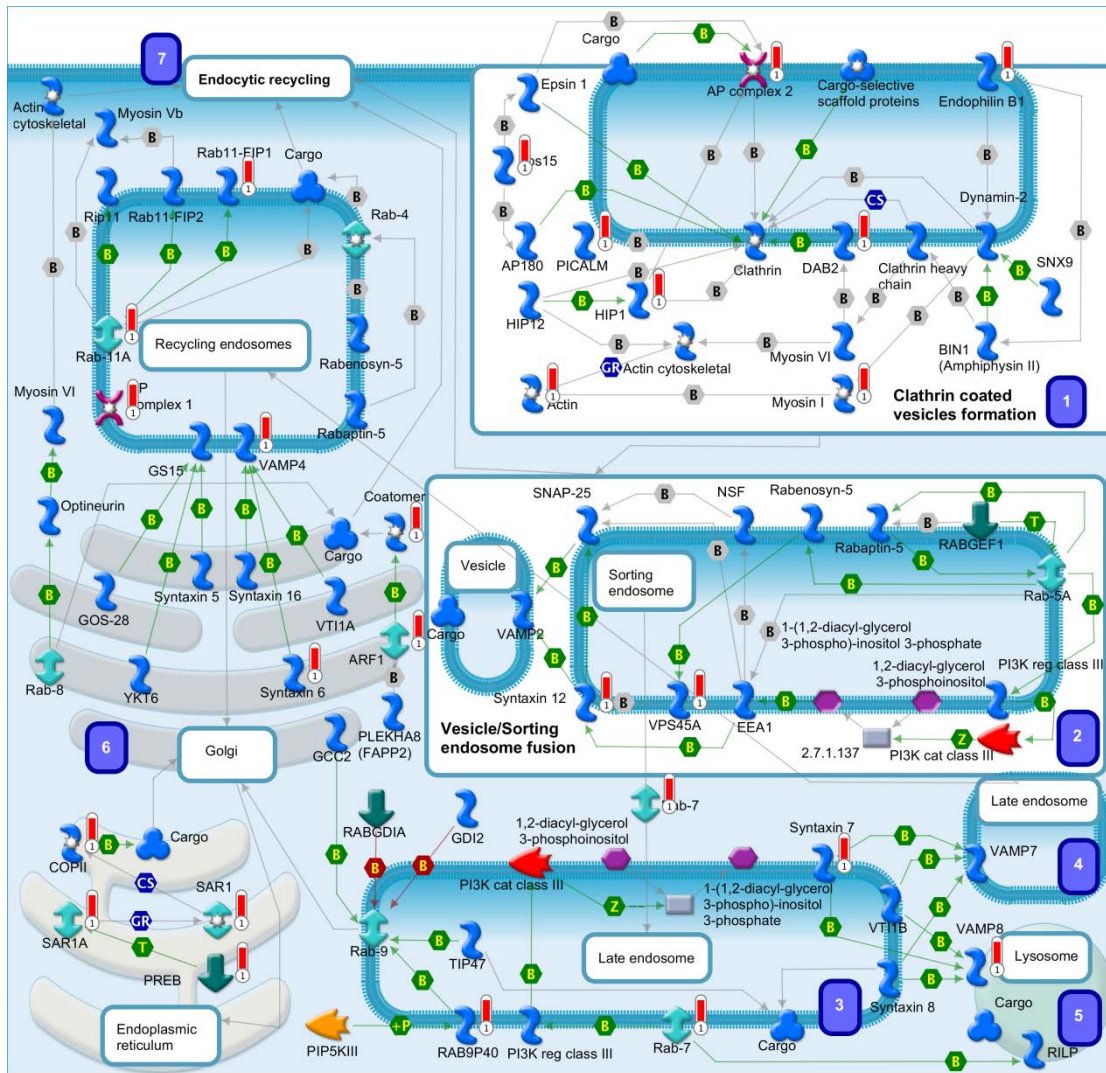

**Figure S5.**

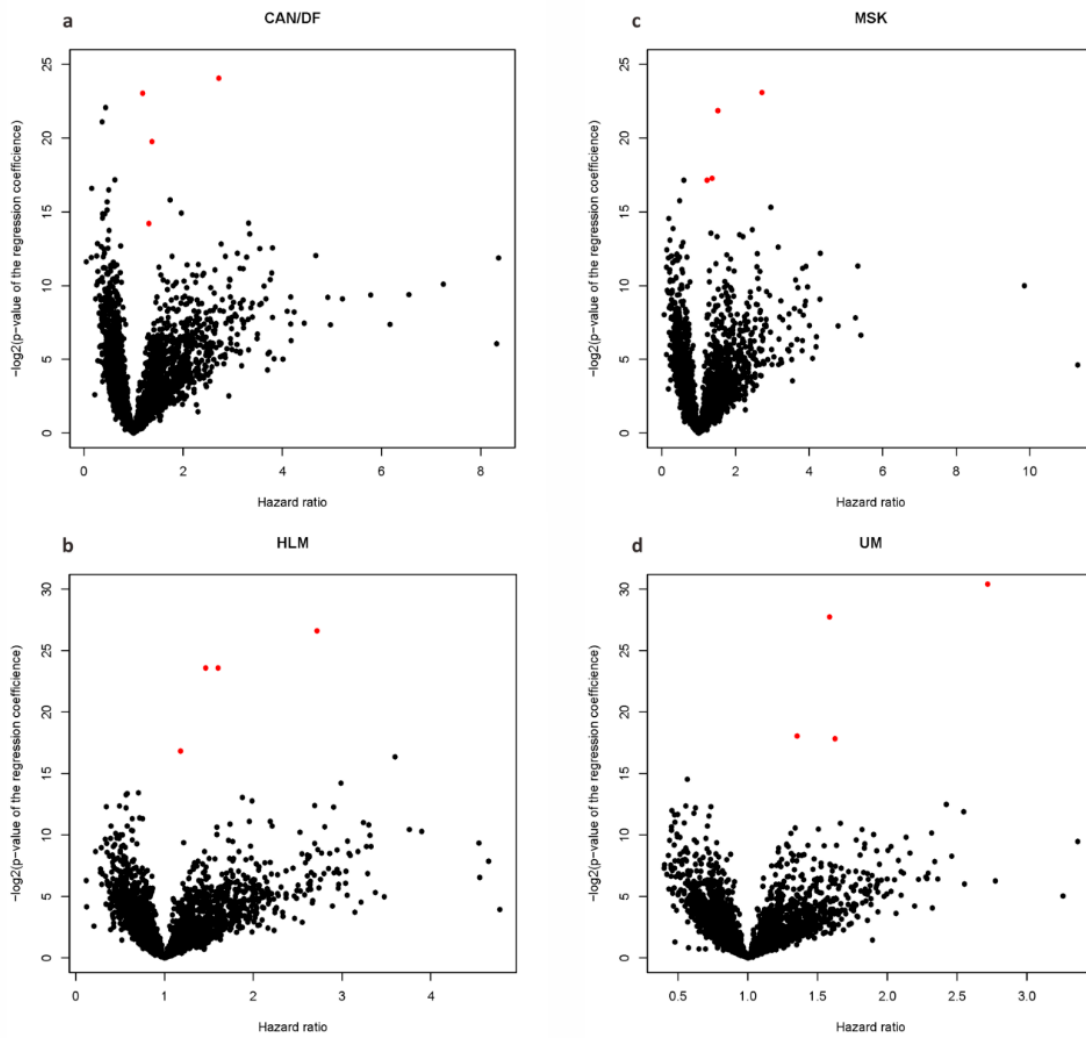

Supplement: srep10979-s1.pdf [file srep10979-s1.pdf]
